# Supplementary material for: Dewetting of ultrathin Ag film with random vacancy defects on a SiO2 substrate: a molecular dynamics simulation
Source: Royal Society of Chemistry journal article supplement (doi:10.1039/d2ra03137j), 2022-01-01
Supplement: d2ra03137j2.pdf [file d2ra03137j2.pdf]

## Electronic supplementary information

# **Dewetting of ultrathin Ag film with random vacancy defects on a SiO<sub>2</sub> substrate: A molecular dynamics simulation**

Lei Wang

College of Mathematics and Physics, Qingdao University of Science and Technology, Shandong Advanced Optoelectronic Materials and Technologies Engineering Laboratory, Qingdao 266061, China.

E-mail: Phdwangl@163.com

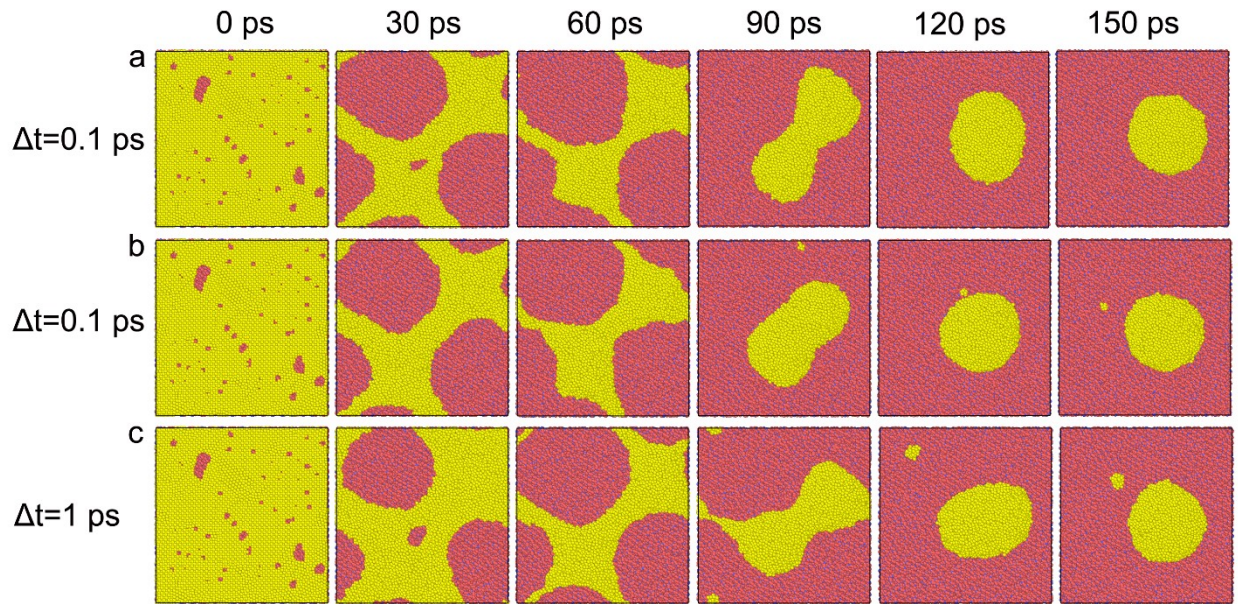

**Fig. S1** Time-dependent dewetting patterns of the 0.4 nm thick Ag film with  $f=0.1$  for different temperature damping parameter of the thermostat:  $\Delta t=0.01$  ps (a);  $\Delta t=0.1$  ps (b), and  $\Delta t=1$  ps (c).
